# Supplementary material for: Patient-reported outcomes and health status associated with chronic graft-versus-host disease
Source: PubMed Central journal article supplement — Haematologica. 2018 Jun 1;103(9):1535–41. doi: 10.3324/haematol.2018.192930 (PMC6119141; doi:10.3324/haematol.2018.192930), 2018-09
Supplement: 2018_192930-Disclosures_and_Contributions.pdf [file 2018_192930-Disclosures_and_Contributions.pdf]

Haematologica  
HAEMATOL/2018/192930  
Version 3

Patient-reported outcomes and health status associated with chronic  
graft-versus-host disease

Stephanie J. Lee, Lynn Onstad, Eric J. Chow, Bronwen E. Shaw,  
Heather S.L. Jim, Karen L. Syrjala, K. Scott Baker, Sarah Buckley, and  
Mary E. Flowers

Disclosures: None

Contributions: Designed research and wrote the paper (SJL), analyzed data (LO),  
interpreted data and revised the paper (all authors).
